# Supplementary material for: 7,8-Dihydroxyflavone alleviates apoptosis and inflammation induced by retinal ischemia-reperfusion injury via activating TrkB/Akt/NF-kB signaling pathway
Source: PubMed Central journal article supplement (PMC8692126; doi:10.7150/ijms.65733), 2022-01-01
Supplement: ijmsv19p0013s1.pdf [file ijmsv19p0013s1.pdf]

Supplemental files:

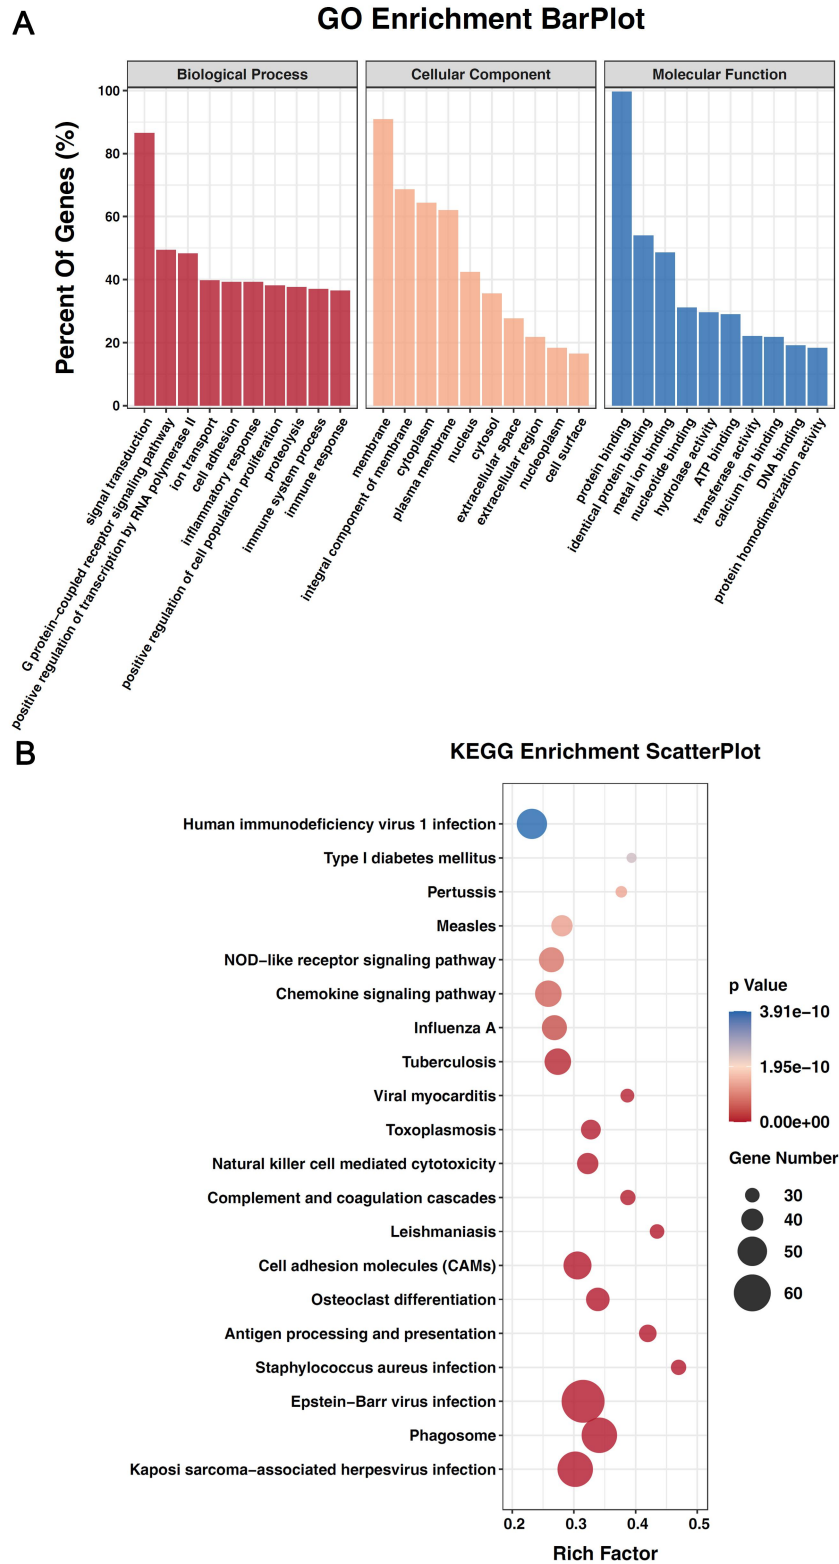

Figure S1. GO and KEGG enrichment analysis for DEGs in RIRI vs Sham.

**Table S3** Primers designed for qRT-PCR

---

| gene name     | primer type | Primer Sequence (5'-3')   |
|---------------|-------------|---------------------------|
| Casp1         | Forward     | GGCATGCCGTGGAGAGAAAC      |
|               | Reverse     | GGTGTGAAGAGCAGAAAGCA      |
| Bcl2a1        | Forward     | CAGAATGGAGGCTGGGAAGAT     |
|               | Reverse     | ACCATTCTCAAGGGAGCCAG      |
| Ccl20         | Forward     | CAGCCAGTCAGAAGCAGCAAG     |
|               | Reverse     | CGGCCATCTGTGTTGTGAAAC     |
| Il17ra        | Forward     | GCTAGGAAAGCCCGTCGT        |
|               | Reverse     | CTAGAGCCGGGAAGTCGAG       |
| Pycard        | Forward     | AGCTGCAAAAGATTATGGAAGAGTC |
|               | Reverse     | GCCTGGTACTGTCCTTCAGTC     |
| Rac2          | Forward     | GATGAGGCAATCCGAGCAGT      |
|               | Reverse     | AGACTGGGAAGACACCCCTA      |
| Tgfb1         | Forward     | GACCGCAACAACGCAATCTA      |
|               | Reverse     | CGTGTGCTCCACAGTTGAC       |
| Myc           | Forward     | CTTACAATCTGCGAGCCAGGA     |
|               | Reverse     | ATCGTCGTGACTGTCGGGTTT     |
| Lgals3        | Forward     | GAGGAGCACTAACCAGGAAAATG   |
|               | Reverse     | TCGAGGGTTTGGGTTTCCAG      |
| Nefm          | Forward     | GAGATCGCCGCATATAGGAAA     |
|               | Reverse     | GTGTACAGAGGCCAGTGAT       |
| Noxa1         | Forward     | AGCACCAAGAGGACCAACAC      |
|               | Reverse     | ACCCTCTCAGTAGTACCTGGAT    |
| Pak1          | Forward     | AGCGAGCGCAGAAGTAGC        |
|               | Reverse     | GGTGTTCATCGGAGGGG         |
| Gfap          | Forward     | GGGCGAAGAAAACCGCATC       |
|               | Reverse     | ATTTGGTGTCCAGGCTGGTT      |
| TNF- $\alpha$ | Forward     | ACTGAACTTCGGGGTGATTG      |
|               | Reverse     | GCTTGGTGGTTTGCTACGAC      |
| IL-6          | Forward     | GGCTAAGGACCAAGACCATCCAA   |
|               | Reverse     | TCTGACCACAGTGAGGAATGTCCA  |
| IL-1 $\beta$  | Forward     | CTCCATGAGCTTTGTACAAGG     |
|               | Reverse     | GGGGTTGACCATGTAGTCGT      |
| IFN- $\gamma$ | Forward     | AAGACAACCAGGCCATCAGCAA    |
|               | Reverse     | GAACTTGGCGATGCTCATGAATGC  |
| GAPDH         | Forward     | GCAAGTTCAACGGCACAG        |
|               | Reverse     | GCCAGTAGACTCCACGACAT      |

---
